# Supplementary material for: Hearing impairment and associated morphological changes in pituitary adenylate cyclase activating polypeptide (PACAP)-deficient mice
Source: PubMed Central journal article supplement (PMC6787024; doi:10.1038/s41598-019-50775-z), 2019-10-10
Supplement: 41598_2019_50775_MOESM1_ESM.pdf [file 41598_2019_50775_MOESM1_ESM.pdf]

## Hearing impairment and associated morphological changes in pituitary adenylate cyclase activating polypeptide (PACAP)-deficient mice

Daniel Balazs Fulop, Viktoria Humli, Judit Szepesy, Virag Ott, Dora Reglodi, Balazs Gaszner, Adrienn Nemeth, Agnes Szirmai, Laszlo Tamas, Hitoshi Hashimoto, Tibor Zelles, Andrea Tamas

### Amplitude

| Frequency | Peak | Stimulus intensity | P value  |
|-----------|------|--------------------|----------|
| 16.4 kHz  | I    | 90 dB SPL          | p=0.0367 |
| 16.4 kHz  | II   | 90 dB SPL          | p=0.0039 |
| 16.4 kHz  | IV   | 70 dB SPL          | p=0.0406 |
| 16.4 kHz  | IV   | 80 dB SPL          | p=0.0042 |
| 16.4 kHz  | IV   | 90 dB SPL          | p<0.0001 |
| 16.4 kHz  | V    | 80 dB SPL          | p=0.0028 |
| 16.4 kHz  | V    | 90 dB SPL          | p=0.0002 |
| 32.8 kHz  | I    | 90 dB SPL          | p=0.0106 |
| 32.8 kHz  | IV   | 70 dB SPL          | p=0.0015 |
| 32.8 kHz  | IV   | 80 dB SPL          | p<0.0001 |
| 32.8 kHz  | IV   | 90 dB SPL          | p<0.0001 |
| 32.8 kHz  | V    | 80 dB SPL          | p=0.0022 |
| 32.8 kHz  | V    | 90 dB SPL          | p=0.0009 |
| 65.6 kHz  | II   | 90 dB SPL          | p=0.0006 |
| 65.6 kHz  | IV   | 80 dB SPL          | p<0.0001 |
| 65.6 kHz  | IV   | 90 dB SPL          | p<0.0001 |
| 65.6 kHz  | V    | 90 dB SPL          | p=0.0008 |

### Latency

| Frequency | Peak | Stimulus intensity | P value  |
|-----------|------|--------------------|----------|
| 16.4 kHz  | I    | 50 dB SPL          | p=0.0134 |
| 16.4 kHz  | II   | 70 dB SPL          | p=0.0021 |
| 16.4 kHz  | V    | 70 dB SPL          | p=0.0418 |
| 65.6 kHz  | I    | 70 dB SPL          | p=0.0211 |
| 65.6 kHz  | II   | 70 dB SPL          | p=0.0052 |
| 65.6 kHz  | V    | 90 dB SPL          | p=0.0274 |

### Occurrence of peak IV

| Frequency | Stimulus intensity | P value  |
|-----------|--------------------|----------|
| 16.4 kHz  | 50 dB SPL          | p=0.0093 |
| 16.4 kHz  | 60 dB SPL          | p=0.0389 |
| 16.4 kHz  | 80 dB SPL          | p=0.0461 |
| 32.8 kHz  | 60 dB SPL          | p=0.0126 |
| 32.8 kHz  | 70 dB SPL          | p=0.0034 |
| 65.6 kHz  | 70 dB SPL          | p=0.0246 |
| 65.6 kHz  | 80 dB SPL          | p=0.0461 |

**Supplementary Table S1.** P values for amplitude and latency measurements and for the occurrence of separately identifiable peak IV at the auditory brainstem responses (ABR).

### R&D Proteome Profiler Mouse Cytokine Array Panel A

|   | 1          | 2      | 3            | 4      | 5    | 6       | 7           | 8            | 9             | 10           | 11     | 12            |
|---|------------|--------|--------------|--------|------|---------|-------------|--------------|---------------|--------------|--------|---------------|
| A | Pos. ctrl  |        |              |        |      |         |             |              |               |              |        | Pos. ctrl     |
| B | <b>BLC</b> | C5a    | G-CSF        | GM-CSF | CCL1 | Eotaxin | <b>CD54</b> | IFN $\gamma$ | IL-1 $\alpha$ | IL-1 $\beta$ | IL-1ra | IL-2          |
| C | IL-3       | IL-4   | IL-5         | IL-6   | IL-7 | IL-10   | IL-12       | IL-13        | IL-16         | IL-17        | IL-23  | IL-27         |
| D | CXCL10     | CXCL11 | CXCL1        | M-CSF  | CCL2 | CCL12   | CXCL9       | CCL3         | CCL4          | CXCL2        | CCL5   | <b>CXCL12</b> |
| E | CCL17      | TIMP-1 | TNF $\alpha$ | TREM-1 |      |         |             |              |               |              |        |               |
| F | Pos. ctrl  |        |              |        |      |         |             |              |               |              |        | Neg. ctrl     |

### R&D Proteome Profiler Mouse Angiogenesis Array Kit

|   | 1         | 2                  | 3         | 4                | 5       | 6      | 7                 | 8              | 9                 | 10            | 11           |
|---|-----------|--------------------|-----------|------------------|---------|--------|-------------------|----------------|-------------------|---------------|--------------|
| A | Pos. ctrl |                    | ADAMTS1   | AR               | ANG     | Ang-1  | Ang-3             | <b>TF</b>      | CXCL16            |               | Pos. ctrl    |
| B |           | Cyr6               | DLL4      | <b>DPPIV</b>     | EGF     | CD105  | <b>Endostatin</b> | ET-1           | <b>FGF acidic</b> | FGF basic     |              |
| C |           | KGF                | CX3CL1    | GM-CSF           | HB-EGF  | HGF    | IGFBP-1           | <b>IGFBP-2</b> | IGFBP-3           | IL-1 $\alpha$ | IL-1 $\beta$ |
| D |           | IL-10              | IP-10     | KC               | Leptin  | CCL2   | CCL3              | MMP-3          | MMP-8             | MMP-9         | NOV          |
| E |           | <b>Osteopontin</b> | PD-ECGF   | PDGF-AA          | PDGF-AB | PTX3   | <b>PF4</b>        | PIGF-2         | PRL               | Proliferin    |              |
| F | Pos. ctrl | SDF-1              | Serpin E1 | <b>Serpin F1</b> | TSP-2   | TIMP-1 | TIMP-4            | VEGF           | VEGF-B            | Neg. ctrl     |              |

**Supplementary Table S2.** Location of all examined proteins on the corresponding representative pictures in Fig. 8. Bold marking shows proteins in detectable amount. Abbreviations used according to the manufacturer's operation manual.

## Supplementary methods

### Genotyping procedures

Phire Animal Tissue Direct PCR Kit (Thermo Fischer Scientific, Waltham, MA, USA) was used for genotyping from mouse tail samples. Primer sequences for detection of WT DNA signatures were 5'-ACC GAA AAC AAA TGG CTG TC-3' (sense) and 5'-GGT CCA CAA AGTATATCT GTG CAT TCT-3' (antisense); and for PACAP KO 5'-ATC TCC TGT CAT CTC ACC TTG CTC CT-3' (sense) and 5'-GAA GAA CTC GTC AAG AGA GGC GAT AG-3' (antisense). After PCR reaction and agarose gel electrophoresis the gels were stained with Sybr Green I (Sigma-Aldrich, Hungary). For evaluation, no template samples were used as negative control and heterozygous PACAP KO templates as positive control.

### Free-floating immunohistochemistry

The sections were washed in 0.1 M sodium PBS solution for 3x10 min to remove the fixative solution. Thereafter, sections were incubated in 0.5% Triton X-100, then in PBS containing 2% normal goat serum (NGS, Jackson ImmunoResearch Europe Ltd., Suffolk, UK) for 30-30 min. Overnight incubation followed with polyclonal anti-c-Fos antiserum (Santa Cruz Biotechnology Inc., sc-52, Santa Cruz, CA, USA, 1:500) in blocking buffer at room temperature. After 3x10 min PBS washes, sections were incubated with biotinylated goat anti-rabbit IgG (Vectastain Elite ABC Kit, Vector Laboratories, Burlingame, CA, USA, 1:200) in PBS containing 2% NGS at room temperature for 2 h. After PBS wash, sections were put in avidin-biotin complex solution (Vectastain Elite ABC Kit, Vector Laboratories, Burlingame, CA, USA) for 1 hour at room temperature then again rinsed with PBS for 3x10 min. For visualization 0.02% 3,3' diaminobenzidine (DAB, D5637, Sigma-Aldrich, Hungary) was used in Tris buffer with H<sub>2</sub>O<sub>2</sub> (0.00003%) for 10 min. Under visual control, the reaction was stopped with PBS. After 3x10 min PBS washes, sections were mounted on gelatine-coated glass slides and after xylene treatment (2x10 min) coverslipped with DePex (Fluka, Heidelberg, Germany). The specificity of the polyclonal antiserum against c-Fos was tested previously in mice by our research group using synthetic c-Fos blocking peptide (Santa Cruz Biotechnology Inc., sc-52 P, Santa Cruz, CA, USA)<sup>1</sup>. Preincubation of the antibody with the blocking peptide eliminated any positive reactions, as did the substitution of the anti-c-Fos serum by nonimmune rabbit serum.

1. Gaszner, B. *et al.* The behavioral phenotype of pituitary adenylate-cyclase activating polypeptide-deficient mice in anxiety and depression tests is accompanied by blunted c-Fos expression in the bed nucleus of the stria terminalis, central projecting Edinger-Westphal nucleus. *Neuroscience* **202**, 283–299 (2012).
